# Supplementary material for: Impact of Heat Stress on Meat Quality and Antioxidant Markers in Iberian Pigs
Source: MDPI journal article supplement (doi:10.3390/antiox10121911), 2021-11-29
Supplement: s1 [file s1]

**Tabla S1. Pearson correlation between the variables studied. First value: *r*; second value: *P*. NS: non-significant.**

|                   | DM               | Fat              | Ash              | Prot             | Kcal             | Fe               | Zn               | pH <sub>24h</sub> | L*               | a*               | b*               | C*               | h°               | C <sub>18:1</sub> | SFA              | MU<br>FA         | PUFA             | MDA              | ABTS             | DP<br>PH         | FRAP             | GPx              | CAT              |
|-------------------|------------------|------------------|------------------|------------------|------------------|------------------|------------------|-------------------|------------------|------------------|------------------|------------------|------------------|-------------------|------------------|------------------|------------------|------------------|------------------|------------------|------------------|------------------|------------------|
| DM                |                  | 0.872<br>0.0001  | -0.579<br>0.0001 | NS               | 0.969<br>0.0001  | NS               | 0.300<br>0.0383  | NS                | -0.344<br>0.017  | 0.432<br>0.0021  | 0.561<br>0.0001  | 0.462<br>0.0009  | NS               | NS                | NS               | NS               | NS               | NS               | 0.4420<br>0.0017 | NS               | 0.3551<br>0.0133 | NS               | -0.335<br>0.0201 |
| Fat               | 0.872<br>0.0001  |                  | -0.629<br>0.0001 | NS               | 0.950<br>0.0001  | NS               | NS               | NS                | NS               | NS               | 0.407<br>0.0041  | NS               | 0.335<br>0.0198  | NS                | NS               | NS               | NS               | NS               | NS               | NS               | NS               | NS               | NS               |
| Ash               | -0.579<br>0.0001 | -0.629<br>0.0001 |                  | NS               | -0.599<br>0.0001 | NS               | NS               | NS                | 0.290<br>0.0455  | NS               | NS               | NS               | NS               | NS                | NS               | NS               | NS               | NS               | -0.321<br>0.0262 | NS               | NS               | NS               | NS               |
| Prot              | NS               | NS               | NS               |                  | NS               | NS               | NS               | -0.366<br>0.0105  | NS               | NS               | NS               | 0.323<br>0.0251  | -0.308<br>0.0332 | NS                | NS               | NS               | NS               | NS               | 0.383<br>0.0071  | NS               | 0.403<br>0.0045  | NS               | -0.385<br>0.0070 |
| Kcal              | 0.969<br>0.0001  | 0.950<br>0.0001  | -0.599<br>0.0001 | NS               |                  | NS               | 0.335<br>0.0201  | NS                | -0.286<br>0.0484 | 0.319<br>0.0273  | 0.507<br>0.0002  | 0.362<br>0.0114  | NS               | NS                | NS               | NS               | NS               | NS               | 0.359<br>0.0123  | NS               | NS               | NS               | NS               |
| Fe                | NS               | NS               | NS               | NS               | NS               |                  | 0.329<br>0.0224  | NS                | -0.442<br>0.0017 | 0.630<br>0.000   | 0.537<br>0.0001  | 0.630<br>0.0001  | NS               | 0.361<br>0.0116   | -0.290<br>0.0454 | 0.291<br>0.0448  | NS               | 0.445<br>0.0015  | NS               | NS               | NS               | -391<br>0.0060   | -0.459<br>0.0010 |
| Zn                | 0.300<br>0.0383  | 0.277<br>0.0566  | NS               | NS               | 0.335<br>0.0201  | 0.329<br>0.0224  |                  | 0.397<br>0.0052   | NS               | NS               | 0.425<br>0.0026  | NS               | 0.372<br>0.0093  | NS                | NS               | NS               | NS               | NS               | NS               | NS               | NS               | NS               | NS               |
| pH <sub>24h</sub> | NS               | NS               | NS               | -0.366<br>0.0105 | NS               | NS               | 0.397<br>0.0052  |                   | -0.079<br>0.5919 | NS               | NS               | NS               | 0.384<br>0.007   | NS                | 0.336<br>0.0194  | -0.295<br>0.0418 | NS               | NS               | NS               | NS               | -0.293<br>0.0433 | NS               | NS               |
| L*                | -0.344<br>0.0168 | NS               | 0.290<br>0.0455  | NS               | -0.286<br>0.0484 | -0.442<br>0.0017 | NS               | NS                |                  | -0.694<br>0.0001 | -0.602<br>0.0001 | -0.696<br>0.0001 | NS               | NS                | NS               | NS               | -0.381<br>0.0075 | -0.476<br>0.0007 | -0.388<br>0.0065 | -0.350<br>0.0147 | NS               | 0.386<br>0.0068  | 0.375<br>0.0086  |
| a*                | 0.432<br>0.0021  | NS               | NS               | 0.362<br>0.0114  | 0.319<br>0.0273  | 0.630<br>0.0001  | NS               | NS                | -0.694<br>0.0001 |                  | 0.830<br>0.0001  | 0.989<br>0.0001  | NS               | NS                | -0.319<br>0.0272 | NS               | 0.378<br>0.0080  | 0.424<br>0.0026  | 0.419<br>0.0031  | NS               | 0.330<br>0.0207  | -0.412<br>0.0036 | -0.592<br>0.0001 |
| b*                | 0.561<br>0.0001  | 0.4066<br>0.0041 | NS               | NS               | 0.507<br>0.0002  | 0.537<br>0.0001  | 0.4254<br>0.0026 | NS                | -0.602<br>0.0001 | 0.8299<br>0.0001 |                  | 0.8845<br>0.0001 | 0.4343<br>0.0020 | NS                | NS               | NS               | NS               | 0.467<br>0.0008  | 0.441<br>0.0017  | NS               | NS               | -0.405<br>0.0043 | -0.557<br>0.0001 |
| C*                | 0.462<br>0.0009  | NS               | NS               | 0.323<br>0.0251  | 0.362<br>0.0114  | 0.630<br>0.0001  | NS               | NS                | -0.696<br>0.0001 | 0.989<br>0.0001  | 0.8845<br>0.0001 |                  | NS               | NS                | NS               | NS               | 0.325<br>0.0243  | 0.441<br>0.0017  | 0.422<br>0.0028  | NS               | 0.305<br>0.0350  | -0.440<br>0.0018 | -0.625<br>0.0001 |
| h°                | NS               | 0.335<br>0.0198  | NS               | -0.308<br>0.0332 | NS               | NS               | 0.372<br>0.0093  | 0.3842<br>0.0070  | NS               | NS               | 0.434<br>0.0020  | NS               |                  | NS                | 0.389<br>0.0063  | NS               |
| C <sub>18:1</sub> | NS               | NS               | NS               | NS               | NS               | 0.3614<br>0.0116 | NS               | NS                | NS               | NS               | NS               | NS               | NS               |                   | -0.638<br>0.0001 | 0.936<br>0.0001  | -0.547<br>0.0001 | NS               | NS               | NS               | NS               | NS               | NS               |
| SFA               | NS               | 0.274<br>0.0597  | NS               | NS               | NS               | -0.290<br>0.0454 | NS               | 0.336<br>0.0194   | NS               | -0.319<br>0.0272 | NS               | NS               | 0.389<br>0.0063  | -0.638<br>0.0001  |                  | -0.707<br>0.0001 | NS               | NS               | NS               | NS               | -0.336<br>0.0196 | NS               | NS               |
| MU<br>FA          | NS               | NS               | NS               | NS               | NS               | 0.291<br>0.0448  | NS               | -0.295<br>0.0418  | NS               | NS               | NS               | NS               | NS               | 0.936<br>0.0001   | -0.707<br>0.0001 |                  | -0.554<br>0.0001 | NS               | NS               | NS               | NS               | NS               | NS               |
| PUFA              | -NS              | NS                | -0.381<br>0.0075 | 0.378<br>0.0080  | NS               | 0.325<br>0.0243  | NS               | -0.547<br>0.001   | NS               | -0.554<br>0.0001 |                  | NS               | NS               | NS               | NS               | NS               | NS               |
| MDA               | NS               | NS               | NS               | NS               | NS               | 0.445<br>0.0015  | NS               | NS                | -0.475<br>0.0007 | 0.424<br>0.0026  | 0.467<br>0.0008  | 0.441<br>0.0017  | NS               | NS                | NS               | NS               | NS               |                  | 0.418<br>0.0031  | NS               | NS               | NS               | NS               |
| ABTS              | 0.442            | NS               | -0.321           | 0.383            | 0.359            | NS               | NS               | NS                | -0.388           | 0.419            | 0.441            | 0.422            | NS               | NS                | NS               | NS               | NS               | 0.418            |                  | NS               | NS               | NS               | -0.293           |

|          |                  |    |        |                  |        |                  |    |                  |                  |                  |                  |                  |    |    |                  |    |    |        |                  |    |    |                 |        |
|----------|------------------|----|--------|------------------|--------|------------------|----|------------------|------------------|------------------|------------------|------------------|----|----|------------------|----|----|--------|------------------|----|----|-----------------|--------|
|          | 0.0017           |    | 0.0262 | 0.0071           | 0.0123 |                  |    |                  | 0.0065           | 0.0031           | 0.0017           | 0.0028           |    |    |                  |    |    | 0.0031 |                  |    |    |                 | 0.0432 |
| DP<br>PH | NS               | NS | NS     | NS               | NS     | NS               | NS | NS               | -0.350<br>0.0147 | NS               | NS               | NS               | NS | NS | NS               | NS | NS | NS     | NS               |    | NS | NS              | NS     |
| FRAP     | 0.355<br>0.0133  | NS | NS     | 0.403<br>0.0045  | NS     | NS               | NS | -0.293<br>0.0433 | NS               | 0.333<br>0.0207  | NS               | 0.305<br>0.0350  | NS | NS | -0.336<br>0.0196 | NS | NS | NS     | NS               | NS |    | NS              | NS     |
| GPx      | NS               | NS | NS     | NS               | NS     | -0.391<br>0.0060 | NS | NS               | 0.386<br>0.0068  | -0.412<br>0.0036 | -0.405<br>0.0043 | -0.440<br>0.0018 | NS | NS | NS               | NS | NS | NS     | NS               | NS |    | 0.327<br>0.0235 |        |
| CAT      | -0.335<br>0.0201 | NS | NS     | -0.385<br>0.0070 | NS     | -0.459<br>0.0010 | NS | NS               | 0.375<br>0.0086  | -0.592<br>0.0001 | -0.557<br>0.0001 | -0.625<br>0.0001 | NS | NS | NS               | NS | NS | NS     | -0.293<br>0.0432 | NS | NS | 0.327<br>0.0235 |        |
